# Supplementary material for: Effect of Calanus finmarchicus Hydrolysate Inclusion on Diet Attractiveness for Whiteleg Shrimp (Litopenaeus vannamei)
Source: MDPI journal article supplement (doi:10.3390/fishes9040134), 2024-04-13
Supplement: s1 [file s1]

## APPENDIX A. Supplementary Data.

**Table S1.** Water parameters in the study.

| Parameter                   | Level measured | Optimal level | Tolerance levels | Measurement tool                                     |
|-----------------------------|----------------|---------------|------------------|------------------------------------------------------|
| Oxygen ( $O_2$ ) (ppm)      | 6.95±0.21      | > 6           | 4 - 12           | Oxyguard handy polaris                               |
| Temperature ( $^{\circ}C$ ) | 30.18±0.48     | 27-30         | 26 - 30          | Extech Instruments – 39240 Digital thermometer       |
| Salinity (‰)                | 25.15±0.46     | 25            | 0.5 - 45         | Refractometer                                        |
| pH                          | 7.21±0.11      | 7.5-8.5       | 6.5 - 8.5        | Oxyguard pH Visocolor® ECO                           |
| Ammonia ( $NH_4^+$ ) (ppm)  | 0.58±0.08      | < 0.8         | 1                | Ammonium; Macherey-Nagel GmbH, Germany               |
| Ammonium ( $NH_3^-$ ) (ppm) | 0.006          | < 0.01        | 0.1              | Calculation                                          |
| Nitrite ( $NO_2^-$ ) (ppm)  | 0.54±0.14      | < 0.25        | < 20             | Visocolor® ECO Nitrite; Macherey-Nagel GmbH, Germany |
| Nitrate ( $NO_3^-$ )(ppm)   | 70.23±19.87    | 0.5 - 20      | 60               | Visocolor® ECO Nitrate; Macherey-Nagel GmbH, Germany |

**Table S2.** Collective performance parameters of whiteleg shrimp fed the attractive diets for 24 days.

| Survival | IBW                     | CV    | FBW                     | CV    | BW                      | GR                      | SGR                    | FI                      | FI/day                  | RFR                    | FCR                  |
|----------|-------------------------|-------|-------------------------|-------|-------------------------|-------------------------|------------------------|-------------------------|-------------------------|------------------------|----------------------|
|          | IBW                     |       | FBW                     |       | gain                    |                         |                        |                         |                         |                        |                      |
| (%)      | (g ind. <sup>-1</sup> ) | (%)   | (g ind. <sup>-1</sup> ) | (%)   | (g ind. <sup>-1</sup> ) | (g ind. <sup>-1</sup> ) | (%BW d <sup>-1</sup> ) | (g ind. <sup>-1</sup> ) | (g ind. <sup>-1</sup> ) | (%BW d <sup>-1</sup> ) | (g g <sup>-1</sup> ) |
| 99.6     | 3.67                    | 11.29 | 10.46                   | 15.68 | 6.79                    | 0.27                    | 4.18                   | 11.89                   | 0.48                    | 7.67                   | 1.76                 |
| ±0.01    | ±0.01                   | ±1.47 | ±0.56                   | ±3.30 | ±0.56                   | ±0.02                   | ±0.21                  | ±0.77                   | ±0.03                   | ±0.33                  | ±0.07                |

IBW: initial body weight; CV: coefficient of variation; FBW: final body weight; BW: body weight; GR: growth rate (also known as average daily gain); SGR: specific growth rate; FI: feed intake; RFR: relative feeding rate; FCR: feed conversion ratio.

Performances from the 36 experimental units were measured and reported in the table above. Values are presented as mean ± standard deviation.

**Table S3.** Feed intake and moisture contents for each diet, with values presented in grams (g).

| Treatment             |     | Low fish meal |        |        |        |        |        | High fish meal |        |        |         |         |         |
|-----------------------|-----|---------------|--------|--------|--------|--------|--------|----------------|--------|--------|---------|---------|---------|
|                       |     |               |        |        |        |        |        |                |        |        |         |         |         |
|                       |     | CTRL          | CH2    | CH4    | CH6    | KM2    | KM3    | CTRL           | CH2    | CH4    | CH6     | KM2     | KM2     |
| Date                  | Day | Diet 1        | Diet 2 | Diet 3 | Diet 4 | Diet 5 | Diet 6 | Diet 7         | Diet 8 | Diet 9 | Diet 10 | Diet 11 | Diet 12 |
| 13.jul                | 0   | 0.19          | 0.17   | 0.18   | 0.25   | 0.18   | 0.18   | 0.26           | 0.18   | 0.23   | 0.19    | 0.17    | 0.23    |
| 14.jul                | 1   | 0.19          | 0.20   | 0.18   | 0.22   | 0.17   | 0.17   | 0.22           | 0.22   | 0.22   | 0.20    | 0.23    | 0.24    |
| 15.jul                | 2   | 0.25          | 0.22   | 0.24   | 0.30   | 0.22   | 0.24   | 0.24           | 0.26   | 0.27   | 0.27    | 0.27    | 0.26    |
| 16.jul                | 3   | 0.31          | 0.27   | 0.28   | 0.27   | 0.27   | 0.28   | 0.27           | 0.22   | 0.27   | 0.27    | 0.28    | 0.26    |
| 17.jul                | 4   | 0.30          | 0.28   | 0.29   | 0.28   | 0.26   | 0.27   | 0.29           | 0.31   | 0.30   | 0.35    | 0.34    | 0.31    |
| 18.jul                | 5   | 0.34          | 0.31   | 0.31   | 0.33   | 0.35   | 0.31   | 0.29           | 0.36   | 0.37   | 0.40    | 0.37    | 0.36    |
| 19.jul                | 6   | 0.39          | 0.39   | 0.39   | 0.38   | 0.36   | 0.40   | 0.35           | 0.41   | 0.41   | 0.40    | 0.39    | 0.39    |
| 20.jul                | 7   | 0.38          | 0.41   | 0.47   | 0.40   | 0.41   | 0.40   | 0.38           | 0.43   | 0.39   | 0.43    | 0.40    | 0.34    |
| 21.jul                | 8   | 0.42          | 0.45   | 0.39   | 0.45   | 0.42   | 0.41   | 0.38           | 0.46   | 0.48   | 0.46    | 0.41    | 0.45    |
| 22.jul                | 9   | 0.41          | 0.49   | 0.47   | 0.43   | 0.46   | 0.42   | 0.43           | 0.45   | 0.48   | 0.49    | 0.46    | 0.46    |
| 23.jul                | 10  | 0.46          | 0.48   | 0.50   | 0.50   | 0.45   | 0.48   | 0.49           | 0.49   | 0.47   | 0.54    | 0.53    | 0.48    |
| 24.jul                | 11  | 0.47          | 0.47   | 0.51   | 0.52   | 0.48   | 0.48   | 0.49           | 0.52   | 0.54   | 0.60    | 0.48    | 0.55    |
| 25.jul                | 12  | 0.51          | 0.54   | 0.52   | 0.59   | 0.52   | 0.50   | 0.54           | 0.50   | 0.60   | 0.58    | 0.47    | 0.58    |
| 26.jul                | 13  | 0.52          | 0.54   | 0.55   | 0.56   | 0.51   | 0.50   | 0.57           | 0.57   | 0.66   | 0.63    | 0.56    | 0.58    |
| 27.jul                | 14  | 0.54          | 0.49   | 0.58   | 0.64   | 0.54   | 0.57   | 0.54           | 0.59   | 0.64   | 0.57    | 0.61    | 0.58    |
| 28.jul                | 15  | 0.58          | 0.60   | 0.63   | 0.60   | 0.58   | 0.56   | 0.55           | 0.55   | 0.63   | 0.63    | 0.58    | 0.56    |
| 29.jul                | 16  | 0.57          | 0.58   | 0.61   | 0.59   | 0.54   | 0.58   | 0.59           | 0.60   | 0.64   | 0.69    | 0.62    | 0.63    |
| 30.jul                | 17  | 0.61          | 0.60   | 0.62   | 0.63   | 0.60   | 0.65   | 0.57           | 0.63   | 0.62   | 0.68    | 0.64    | 0.61    |
| 31.jul                | 18  | 0.63          | 0.63   | 0.71   | 0.66   | 0.63   | 0.69   | 0.61           | 0.74   | 0.70   | 0.72    | 0.66    | 0.63    |
| 01.aug                | 19  | 0.61          | 0.67   | 0.73   | 0.74   | 0.61   | 0.71   | 0.65           | 0.74   | 0.70   | 0.67    | 0.68    | 0.61    |
| 02.aug                | 20  | 0.66          | 0.63   | 0.66   | 0.70   | 0.62   | 0.63   | 0.62           | 0.70   | 0.74   | 0.71    | 0.61    | 0.69    |
| 03.aug                | 21  | 0.66          | 0.73   | 0.68   | 0.73   | 0.73   | 0.70   | 0.70           | 0.70   | 0.77   | 0.78    | 0.73    | 0.69    |
| 04.aug                | 22  | 0.65          | 0.70   | 0.70   | 0.69   | 0.67   | 0.71   | 0.66           | 0.70   | 0.76   | 0.78    | 0.72    | 0.71    |
| 05.aug                | 23  | 0.68          | 0.70   | 0.76   | 0.80   | 0.64   | 0.69   | 0.69           | 0.73   | 0.74   | 0.81    | 0.76    | 0.77    |
| 06.aug                | 24  | 0.71          | 0.68   | 0.74   | 0.82   | 0.71   | 0.72   | 0.73           | 0.71   | 0.78   | 0.79    | 0.65    | 0.76    |
| Sum:                  |     | 11.86         | 12.05  | 12.50  | 12.85  | 11.75  | 12.05  | 11.85          | 12.60  | 13.18  | 13.45   | 12.46   | 12.49   |
| Moisture content feed |     | 7.6           | 7.3    | 6.7    | 6.9    | 5.8    | 5.2    | 6.3            | 6.4    | 6.8    | 7.7     | 7.6     | 7.6     |

CTRL: Control; CH2: Diet with 2 % calanus hydrolysate; CH4: Diet with 4 % calanus hydrolysate; CH6: Diet with 6 % calanus hydrolysate; KM2: Diet with 2 % krill meal; KM3: Diet with 3 % krill meal.

**Table S4.** Summary of Kruskal-Wallis non-parametrical test, for low fish meal group.

| Prior condition: Test           |    | Df | Statistic                     | P-value    |
|---------------------------------|----|----|-------------------------------|------------|
| Normality: Shapiro-Wilk         |    |    | w=0.95275                     | P=0.4698   |
| Homoscedasticity: Breusch-Pagan |    | 6  | BP=9.625                      | P=0.1414   |
| Independance: Durbin-Watson     |    |    | DW=0.67997                    | P=0.005266 |
| Kruskal-Wallis Table            | n  | Df | Chi-squared (X <sup>2</sup> ) | P-value    |
|                                 | 36 | 6  | 12.396                        | P=0.05369  |

**Table S5.** Summary of one-way ANOVA, for high fish meal diet group.

| Prior condition: Test             |    |            | Df          | Statistic     | P-value                |
|-----------------------------------|----|------------|-------------|---------------|------------------------|
| Normality: Shapiro-Wilk           |    |            |             | w=0.92189     | P=0.1396               |
| Homoscedasticity: Breusch-Pagan   |    |            | 5           | BP=9.6388     | P=0.08614              |
| Independance: Durbin-Watson       |    |            |             | DW=1.8471     | P=0.4737               |
| ANOVA table                       | Df | Sum Square | Mean Square | F(DFn, DFd)   | P-value                |
| Treatment<br>(between<br>colums)  | 5  | 304.9      | 60.98       | F(5,12)=44.19 | P=2.56e <sup>-07</sup> |
| Residuals<br>(within<br>colmunns) | 12 | 16.56      | 1.38        |               |                        |
| Total                             | 17 | 321.46     |             |               |                        |

**Table S6.** Simple linear regression (response curve), by ingredient wet weight inclusion.

|                                         | CH               | KM                |
|-----------------------------------------|------------------|-------------------|
| <b>Best-fit values</b>                  |                  |                   |
| Slope                                   | 1,873            | 1,287             |
| Y-intercept                             | 0,000            | 0,000             |
| X-intercept                             | 0,000            | 0,000             |
| 1/slope                                 | 0,5339           | 0,7771            |
| <b>Std. Error</b>                       |                  |                   |
| Slope                                   | 0,09807          | 0,05872           |
| Y-intercept                             |                  |                   |
| <b>95% Confidence Intervals</b>         |                  |                   |
| Slope                                   | 1,561 to 2,185   | 1,034 to 1,540    |
| Y-intercept                             | 0,000 to 0,000   | 0,000 to 0,000    |
| X-intercept                             | -1,153 to 0,9820 | -0,7714 to 0,6378 |
| <b>Goodness of Fit</b>                  |                  |                   |
| Sy.x                                    | 0,7339           | 0,2117            |
| <b>Is slope significantly non-zero?</b> |                  |                   |
| F                                       | 364,8            | 480,2             |
| DFn, DFd                                | 1, 3             | 1, 2              |
| P value                                 | 0,0003           | 0,0021            |
| Deviation from zero?                    | Significant      | Significant       |

|                 |                             |                             |
|-----------------|-----------------------------|-----------------------------|
| <b>Equation</b> | $Y = 1,873 \cdot X + 0,000$ | $Y = 1,287 \cdot X + 0,000$ |
|-----------------|-----------------------------|-----------------------------|

**Table S7.** Simple linear regression (response curve), by ingredient dry weight inclusion.

|                                         | <b>CH</b>                   | <b>KM</b>                   |
|-----------------------------------------|-----------------------------|-----------------------------|
| <b>Best-fit values</b>                  |                             |                             |
| Slope                                   | 3,514                       | 1,406                       |
| Y-intercept                             | 0,000                       | 0,000                       |
| X-intercept                             | 0,000                       | 0,000                       |
| 1/slope                                 | 0,2846                      | 0,7112                      |
| <b>Std. Error</b>                       |                             |                             |
| Slope                                   | 0,1840                      | 0,06418                     |
| Y-intercept                             |                             |                             |
| <b>95% Confidence Intervals</b>         |                             |                             |
| Slope                                   | 2,929 to 4,100              | 1,130 to 1,682              |
| Y-intercept                             | 0,000 to 0,000              | 0,000 to 0,000              |
| X-intercept                             | -0,5767 to 0,4910           | -0,7717 to 0,6379           |
| <b>Goodness of Fit</b>                  |                             |                             |
| Sy.x                                    | 0,6885                      | 0,2314                      |
| <b>Is slope significantly non-zero?</b> |                             |                             |
| F                                       | 364,8                       | 480,0                       |
| DFn, DFd                                | 1, 3                        | 1, 2                        |
| P value                                 | 0,0003                      | 0,0021                      |
| Deviation from zero?                    | Significant                 | Significant                 |
| <b>Equation</b>                         | $Y = 3,514 \cdot X + 0,000$ | $Y = 1,406 \cdot X + 0,000$ |

**Table S8.** Molecular weight distribution of calanus hydrolysate (CH).

| <b>Molecular weight</b> | <b>% protein</b> |
|-------------------------|------------------|
| < 20 000                | 0.1              |
| 6 000 – 20 000          | 0.6              |
| 1 000 – 6 000           | 12.2             |
| 200 – 1000              | 34.7             |
| < 200                   | 52.5             |
